# Supplementary material
Source: PubMed Central journal article supplement (PMC5633106)
Supplement: 10.1074_M117.788299_jbc.M117.788299-1.pdf [file 10.1074_M117.788299_jbc.M117.788299-1.pdf]

A

|                          | S                | L                       | L+AA                    | L+AA+ PPAR $\alpha$ si                         |
|--------------------------|------------------|-------------------------|-------------------------|------------------------------------------------|
| LvAWDd<br>(mm)           | 2.29 $\pm$ 0.083 | 2.75 $\pm$ 0.067<br>*** | 2.06 $\pm$ 0.029<br>### | 2.88 $\pm$ 0.059<br>$\uparrow\uparrow\uparrow$ |
| LvAWDs<br>(mm)           | 2.94 $\pm$ 0.117 | 3.98 $\pm$ 0.107<br>*** | 3.69 $\pm$ 0.134<br>##  | 4.15 $\pm$ 0.080<br>$\uparrow\uparrow\uparrow$ |
| LvPWDd<br>(mm)           | 1.80 $\pm$ 0.003 | 1.94 $\pm$ 0.046<br>*   | 1.66 $\pm$ 0.047<br>#   | 2.01 $\pm$ 0.116<br>$\uparrow$                 |
| LvPWDs<br>(mm)           | 2.44 $\pm$ 0.096 | 3.11 $\pm$ 0.176<br>*   | 2.24 $\pm$ 0.096<br>#   | 3.08 $\pm$ 0.109<br>$\uparrow$                 |
| LvIDd<br>(mm)            | 3.56 $\pm$ 0.087 | 5.65 $\pm$ 0.185<br>**  | 4.91 $\pm$ 0.109<br>##  | 5.57 $\pm$ 0.133<br>$\uparrow\uparrow$         |
| %FS                      | 59 $\pm$ 1.094   | 38 $\pm$ 2.381<br>**    | 49 $\pm$ 1.618<br>##    | 38 $\pm$ 1.352<br>$\uparrow\uparrow$           |
| SV<br>(cm <sup>3</sup> ) | 0.20 $\pm$ 0.004 | 0.19 $\pm$ 0.003<br>*   | 0.20 $\pm$ 0.003<br>#   | 0.19 $\pm$ 0.002<br>$\uparrow$                 |
| %EF                      | 91 $\pm$ 1.126   | 76 $\pm$ 1.129<br>***   | 87 $\pm$ 0.940<br>###   | 74 $\pm$ 0.741<br>$\uparrow\uparrow\uparrow$   |

B

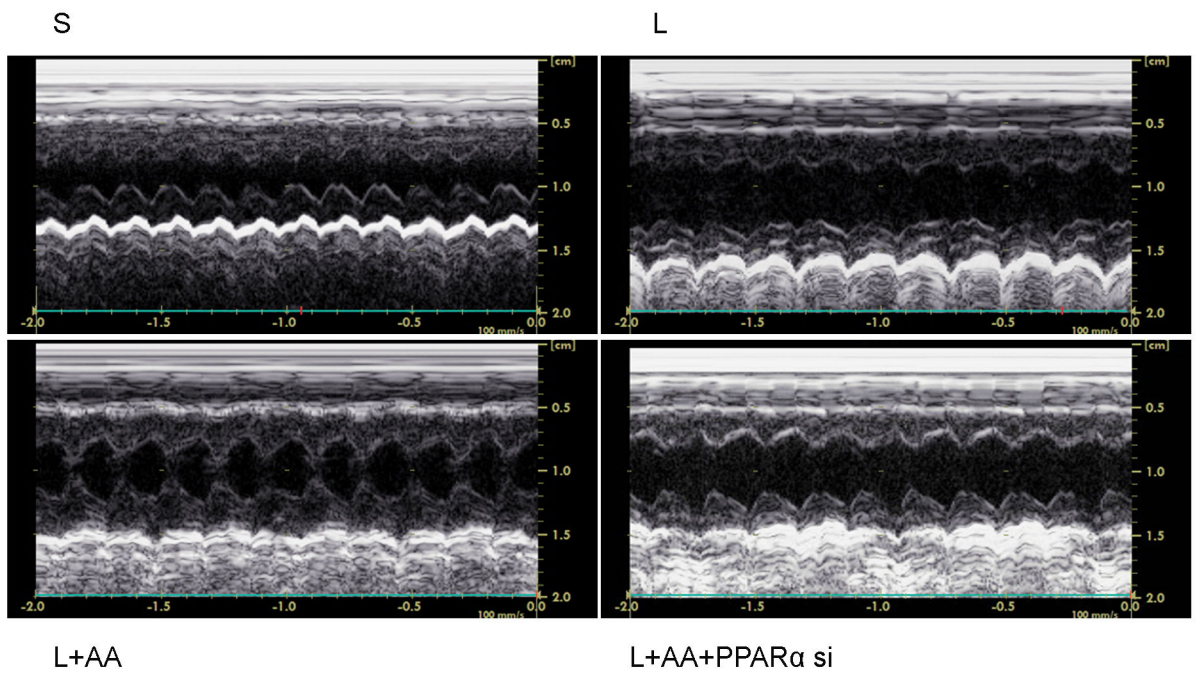

### S-1: M-mode echocardiographic analyses:

S-1A: Mean values of anterior (LvAWD) and posterior (LvPWD) wall thickness both in diastole(d) and systole(s), left ventricular internal diastolic diameter (LvIDd), percentage of fractional shortening (%FS), left ventricular volume in diastole and systole represented by stroke volume (SV) as well as percentage of left ventricular ejection fraction (EF) from all the *in vivo* experimental groups shown in table. Results were analyzed by one way analysis of variance (ANOVA) followed by Tukey's post-hoc test and expressed as  $\pm$ S.E. of three independent experiments. n=7 for each experimental group. \*, p<0.05 with respect to S; \*\*, p<0.01 with respect to S; \*\*\*, p<0.001 with respect to S; #, p<0.05 with respect to L; ## p<0.01 with respect to L; ###, p<0.001 with respect to L; †, p<0.05 with respect to L+AA; ††, p<0.01 with respect to L+AA; †††, p<0.001 with respect to L+AA.

S-1B: Representative images of M-mode echocardiographic analyses from different *in vivo* experimental groups.

S; Sham operated control group, L; Ligated rat group, L+AA; AA treated Ligated rat group, L+AA+PPAR $\alpha$  si; PPAR $\alpha$  siRNA infused AA treated ligated rat group. S and L groups were treated with equivalent amount of DMSO and NS siRNA. L+AA group animals were also treated with equivalent amount of NS siRNA.

## Supplementary Figure S-1
