# Supplementary material
Source: PubMed Central journal article supplement (PMC5633106)
Supplement: 10.1074_M117.788299_jbc.M117.788299-2.pdf [file 10.1074_M117.788299_jbc.M117.788299-2.pdf]

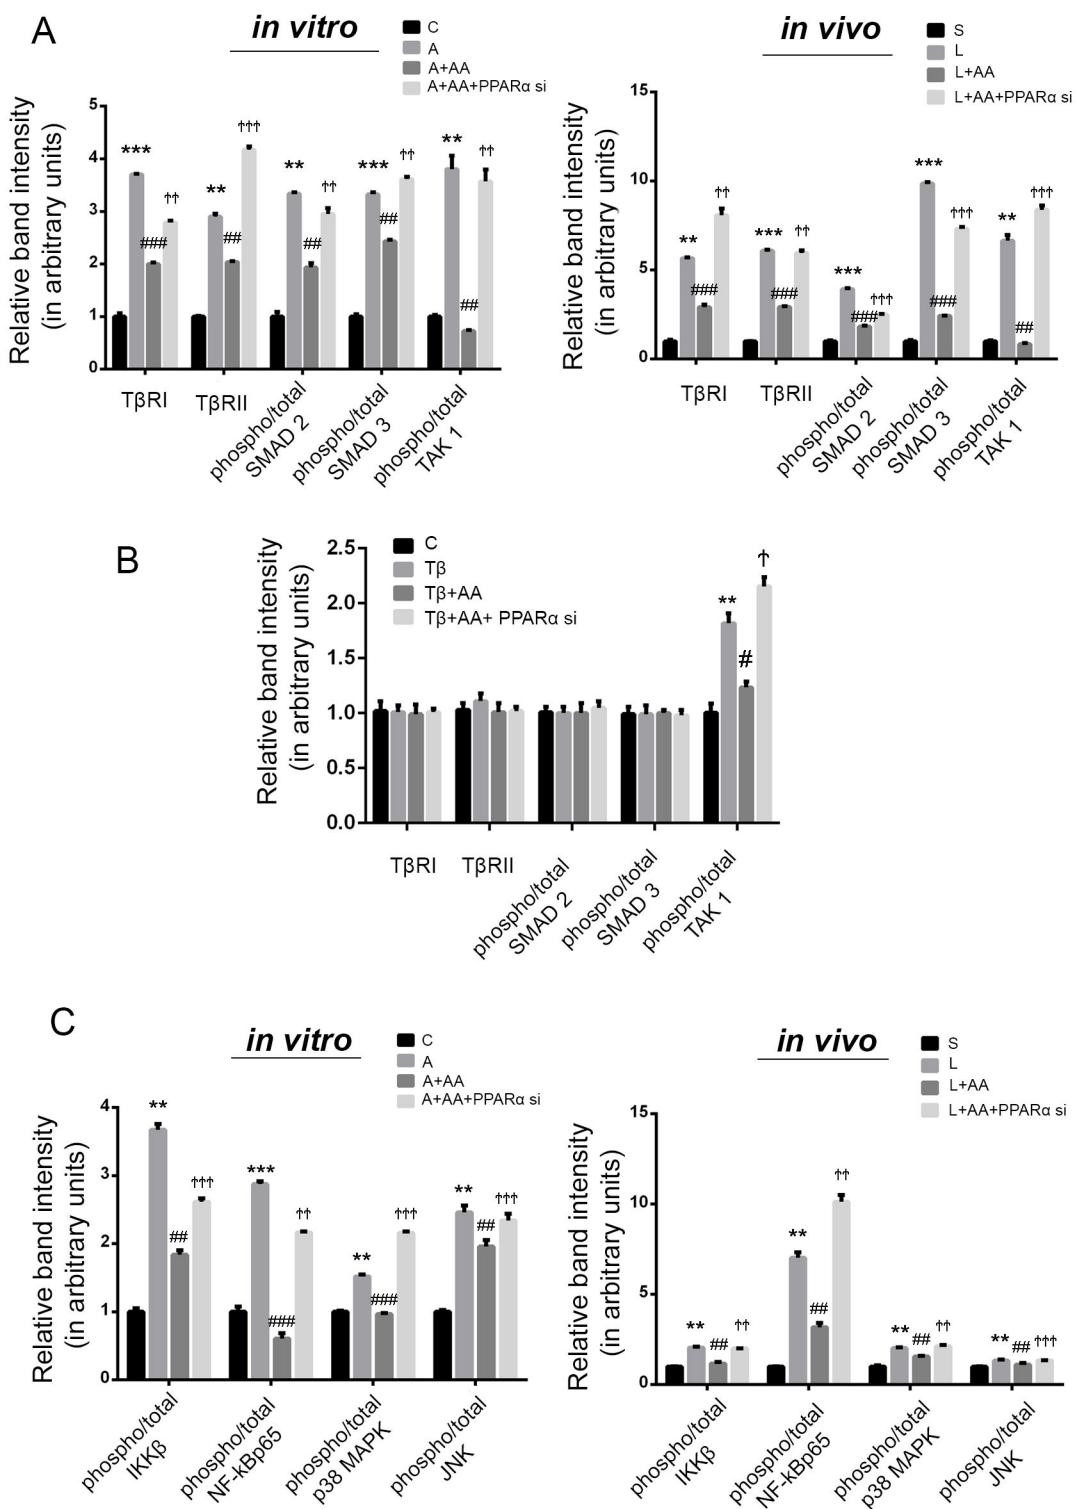

**S-2:** Graphical representations of relative band intensities of Western Blot analyses in different experimental groups. Results were analyzed by one way analysis of variance (ANOVA) followed by Tukey's post-hoc test and expressed as  $\pm$ S.E. of three independent experiments.

## Supplementary Figure S-2
