# Supplementary material
Source: PubMed Central journal article supplement (PMC5633106)
Supplement: 10.1074_M117.788299_jbc.M117.788299-3.pdf [file 10.1074_M117.788299_jbc.M117.788299-3.pdf]

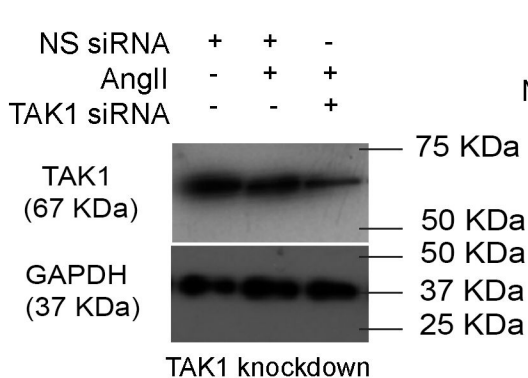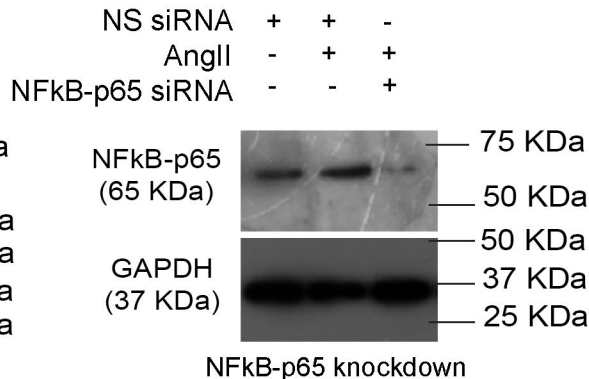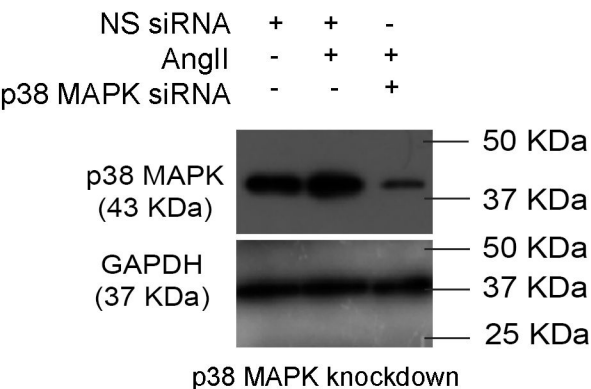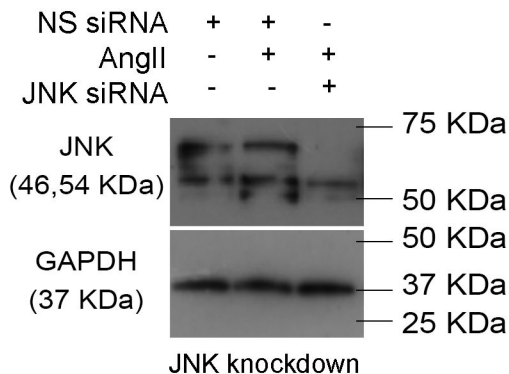

**S-3:** Western blot analyses showing successful knockdown of target proteins by respective siRNA treatments in AngII treated cardiac fibroblasts *in vitro*

## Supplementary Figure S-3
