# Supplementary material
Source: PubMed Central journal article supplement (PMC5633106)
Supplement: 10.1074_M117.788299_jbc.M117.788299-4.pdf [file 10.1074_M117.788299_jbc.M117.788299-4.pdf]

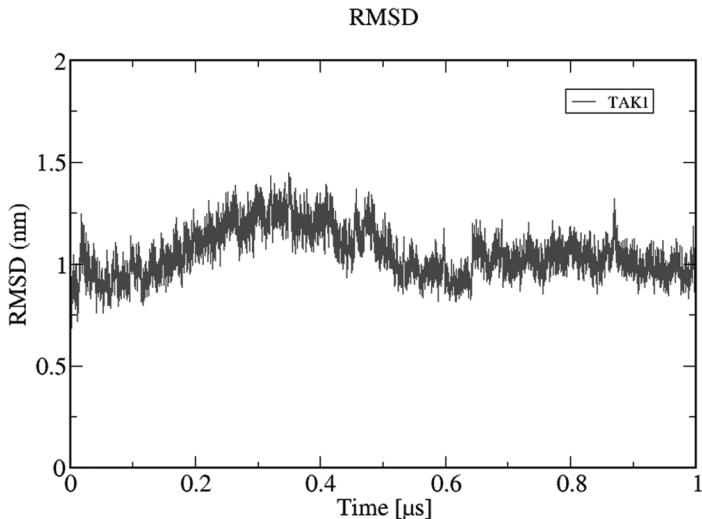

**S-4:** Root Mean Square Deviation (RMSD) across the simulation length for Rat\_TAK1

## Supplementary Figure S-4
