# Supplementary material
Source: PubMed Central journal article supplement (PMC5633106)
Supplement: 10.1074_M117.788299_jbc.M117.788299-5.pdf [file 10.1074_M117.788299_jbc.M117.788299-5.pdf]

A

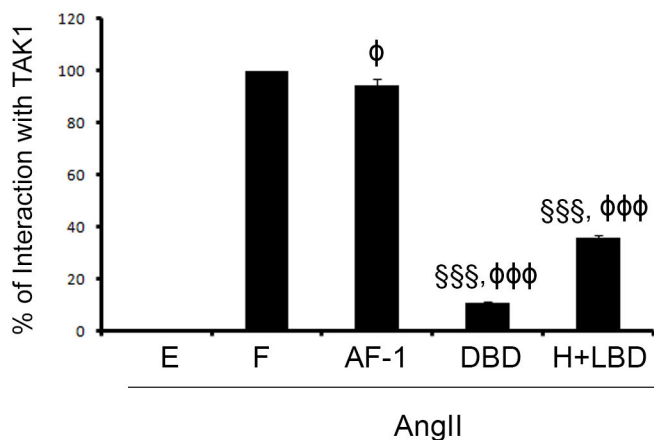

B

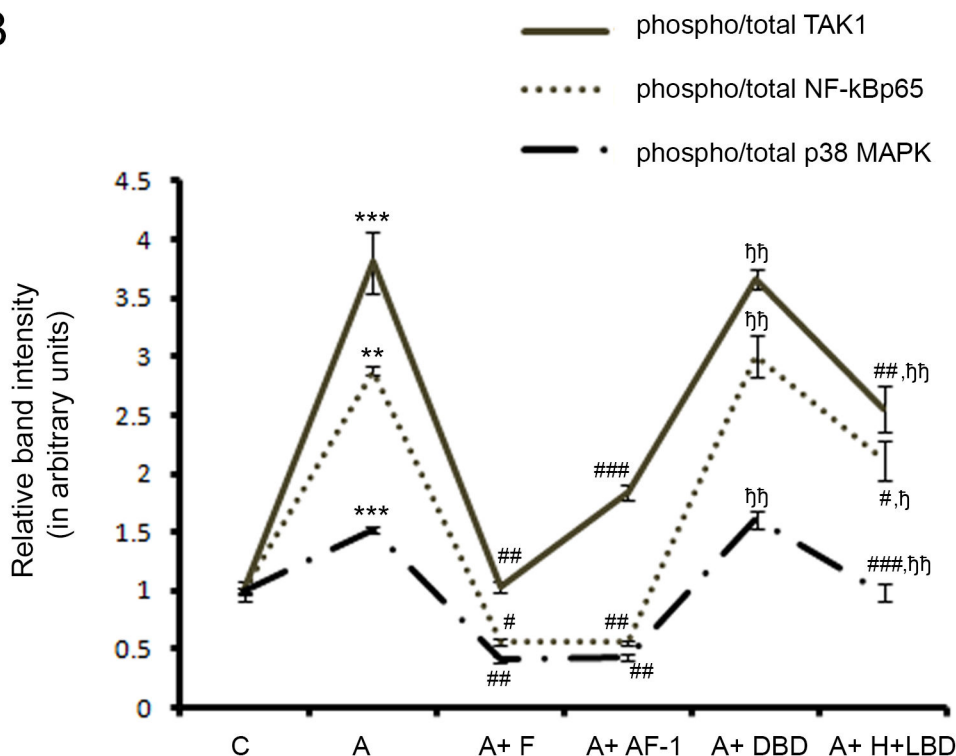

### S-5: Effect of PPAR $\alpha$ domains upon modulation of PPAR $\alpha$ ::TAK1 interaction and TAK1-driven non-canonical TGF- $\beta$ pathway in AngII treated cardiac fibroblasts.

A: Graph showing relative intensity of binding between different PPAR $\alpha$  domains to TAK1 in AngII treated cells.  $\phi$ ;  $p < 0.05$  compared to 'F' plasmid infused AngII treated cells,  $\phi\phi\phi$ ;  $p < 0.001$  compared to 'F' plasmid infused AngII treated cells,  $\S\S\S$ ;  $p < 0.001$  compared to 'AF-1' plasmid infused AngII treated cells.

B. Graph showing relative effect of different PPAR $\alpha$  domains regulating TAK1 mediated non-canonical TGF- $\beta$  signaling pathway. \*\*\*  $p < 0.001$  with respect to empty plasmid infused control cells; \*\*  $p < 0.01$  with respect to empty plasmid infused control cells; #  $p < 0.05$  with respect to empty plasmid infused AngII treated fibroblasts; ##  $p < 0.01$  with respect to empty plasmid infused AngII treated fibroblasts; ###  $p < 0.001$  with respect to empty plasmid infused AngII treated fibroblasts;  $\eta$ ,  $p < 0.05$  with respect to 'AF-1' plasmid infused AngII treated cells;  $\eta\eta$ ,  $p < 0.01$  with respect to 'AF-1' plasmid infused AngII treated cells.

## Supplementary Figure S-5
